# Supplementary material for: HABP2 G534E Variant in Papillary Thyroid Carcinoma
Source: PubMed Central journal article supplement (PMC4706330; doi:10.1371/journal.pone.0146315), 2016-01-08
Supplement: pone.0146315.s003.pdf [file pone.0146315.s003.pdf]

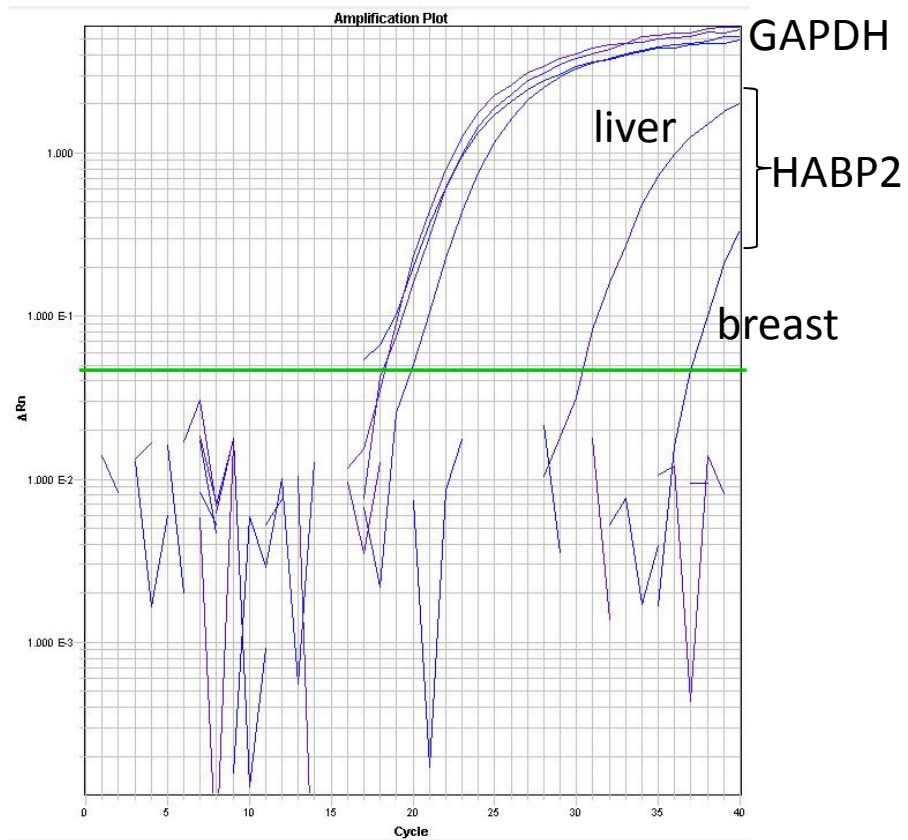

**S3 Fig. qPCR reaction in normal kidney, liver, breast and brain.** cDNA was synthesized on total RNA extracted from samples. PrimeTime® qPCR assay Hs.PT.58.592181 was used to test for HABP2 expression. GAPDH used as internal control was expressed in all samples.
