# Supplementary material for: HABP2 G534E Variant in Papillary Thyroid Carcinoma
Source: PubMed Central journal article supplement (PMC4706330; doi:10.1371/journal.pone.0146315), 2016-01-08
Supplement: pone.0146315.s005.pdf [file pone.0146315.s005.pdf]

**S1 Table. Clinical and demographic information on cases and controls**

|                             | Cases N (%)               | Controls N (%)             |
|-----------------------------|---------------------------|----------------------------|
| <b>Gender</b>               |                           |                            |
| Female                      | 898 (77)                  | 1069 (76)                  |
| Male                        | 272 (23)                  | 335 (24)                   |
|                             |                           |                            |
| <b>Race</b>                 |                           |                            |
| Caucasian                   | 1097 (93.8)               | 1317 (93.8)                |
| African American            | 42 (3.6)                  | 54 (3.8)                   |
| Asian                       | 31 (2.6)                  | 33 (2.4)                   |
|                             |                           |                            |
| <b>Mean age<sup>^</sup></b> | 41.4 yrs (range 7-88 yrs) | 43.8 yrs (range 18-87 yrs) |
|                             |                           |                            |
| <b>Histologic sub-type</b>  |                           |                            |
| PTC, classic type           | 680                       |                            |
| PTC, follicular variant     | 240                       |                            |
| microPTC                    | 207                       |                            |
| PTC, other                  | 43                        |                            |
| <b>Total</b>                | 1170 (100)                | 1404(100)                  |

<sup>^</sup> Mean age of cases is age at diagnosis of thyroid cancer; mean age for controls is age at time of study enrollment and blood draw.

PTC = papillary thyroid carcinoma; microPTC = PTC less than 1.0 cm in dimension
